# Supplementary material for: Confined synthesis of condensed π-conjugation C-PAN/MS-CN nanotubes for efficient photocatalytic H2 evolution
Source: Royal Society of Chemistry journal article supplement (doi:10.1039/d2cc00237j), 2022-01-01
Supplement: d2cc00237j1.pdf [file d2cc00237j1.pdf]

## Electronic Supplementary Information

### **Confined synthesis of condensed $\pi$ -conjugation C-PAN/MS-CN nanotubes for efficient photocatalytic H<sub>2</sub> evolution**

Fang He,\* Meng Wang, Siyi Shi, Yaru Hou, Meiyi Lai, Zhenxing Wang, Shaoqin Peng, Yuexiang Li\*

College of Chemistry, Nanchang University, Nanchang, 330031, P.R. China

#### AUTHOR INFORMATION

#### **Corresponding Author**

\*E-mail: hefang1009@163.com (F. He); liyx@ncu.edu.cn (Y. Li)

## Experimental Section

**Materials.** Melamine (MA, C<sub>3</sub>H<sub>6</sub>N<sub>6</sub>), KCl and LiCl were purchased from Shanghai Aladdin Bio-Chem Technology Co. Ltd., polyacrylonitrile (PAN, average Mw 150000) were purchased from Shanghai Macklin Biochemical Co., Ltd, triethanolamine (TEOA), chloroplatinic acid hexahydrate (H<sub>2</sub>PtCl<sub>6</sub>·6H<sub>2</sub>O) were purchased from Sinopharm Chemical Reagent Co. Ltd. All chemicals were not purified by further and were analytic grade.

**Synthesis.** The C-PAN/MS-CN were prepared as follows: 1 g of melamine with a certain content of PAN (0, 0.5 wt%, 1.0 wt%, 2.0 wt%) was respectively mixed with KCl (2.75 g) and LiCl (2.25 g) via grinding for 15 minutes. Then the mixture placed in an alumina crucible with a cover heating in N<sub>2</sub> flow at 500 °C for 4 h with a rate of 10 °C min<sup>-1</sup>. The calcined samples were washed using the boiled water to get rid of the needless salts for several times and dried at 80 °C in oven for 12 h. The sample was marked as MS-CN, 0.5 wt% C-PAN/MS-CN, 1.0 wt% C-PAN/MS-CN and 2.0 wt% C-PAN/MS-CN respectively. As a control, carbonized PAN marked as C-PAN was obtained from sintering PAN at the same condition. pristine CN or 1.0 wt% C-PAN/CN was obtained by directly heating melamine or 1.0 wt% PAN with melamine in N<sub>2</sub> flow at 500 °C for 4 h with a rate of 10 °C min<sup>-1</sup> without KCl and LiCl.

**Characterization.** X-ray diffraction (XRD) was measured on a XD-2/3 polycrystalline X-ray diffractometer with nickel-filtered Cu K $\alpha$  radiation as the X-ray source. Fourier transform infrared (FT-IR) spectra were taken utilizing a IS 10

AKZ1800251. X-ray photoelectron spectra (XPS) were acquired on an ESCALAB250Xi (ThermoFisher Scientific) equipped with an Al K $\alpha$  X-ray source using C1s peak at 284.6 eV as the internal reference. The scanning electron microscopy (SEM) images were performed on a JEOL JSM 6701 F. The transmission electron microscopy (TEM) of the prepared samples were observed on a JEM-2100 electron microscope (JEOL Ltd). N<sub>2</sub> adsorption-desorption isotherm were tested by specific area and porosity analyzer on the JW-BK132F. UV-vis diffuse reflectance spectroscopy was carried out on a Hitachi U-3310 spectrophotometer equipped with an integrating sphere accessory with BaSO<sub>4</sub> as a reference. The photoluminescence (PL) was conducted on a Perkin-Elmer, LS-55 luminescence spectrometer at room temperature using 370 nm as the excitation wavelength, and time-resolved fluorescence decay spectra were obtained on a FLS1000 steady state and lifetime fluorescence spectrometer (Edinburgh, Britain). Electron paramagnetic resonance (EPR) spectra were obtained using an EPR spectrometer (Bruker EMXplus) at room temperature.

**Electrochemical and Photoelectrochemical Measurements.** Electrochemical tests containing Electrochemical impedance spectroscopy (EIS) and Mott-Schottky plots were conducted in a standard three-electrode system on an Ivium electrochemical instrument. The working electrode was prepared as following: 5 mg catalyst was uniformly dispersed 990  $\mu$ L H<sub>2</sub>O and 10  $\mu$ L Nafion by sonication for an hour, then taking out 100  $\mu$ L and dispersed 900  $\mu$ L H<sub>2</sub>O by sonication for 2 hours. Finally, 10  $\mu$ L of dispersion was drop into the glassy carbon electrode and dried at the room

temperature. The Ag/AgCl and the platinum filament were respectively as a reference electrode and a counter electrode. The PBS solution was as the electrolyte. EIS was implemented on the alternating voltage of 10 mV at the frequency range of  $10^5$  to  $10^{-2}$  Hz. Mott-Schottky curve was carried out the constant frequency of 1000 Hz (vs Ag/AgCl).

Photocurrent was measured by LK 98BII electrochemical workstation in a three-electrode system, using  $0.1 \text{ mol L}^{-1} \text{ Na}_2\text{SO}_4$  aqueous solution as electrolyte. The reference and the counter electrode were the same with EIS. The working electrode was made of photocatalyst using a fluorine-doped tin oxide (FTO) conducting glass: Firstly, FTO conducting glasses ( $1.0 \times 3.0 \text{ cm}$ ) were ultrasonic rinsed using alcohol and water for 20 min: 5 mg catalyst was decentralized in 250  $\mu\text{L}$  of dimethyl formamide (DMF) by sonication for 4 hours. Then, 10  $\mu\text{L}$  of uniform slurry was coated onto a  $1.0 \times 1.0 \text{ cm}$  FTO conducting glassy and dried at room temperature.

**Photocatalytic Measurements.** The photocatalytic  $\text{H}_2$  evolution reaction was performed on a gas-tight circulation system with a side window. 0.1 g of photocatalyst powder was suspended by sonication in 100 mL of 10 vol% triethanolamine (TEOA) aqueous solution with 3 wt% Pt loading. Prior to irradiation, the suspension was bubbled with  $\text{N}_2$  for 25 min to remove  $\text{O}_2$ . The suspension was irradiated using a 300 W Xe lamp with a cutoff filter ( $\lambda > 400 \text{ nm}$ ) from Beijing Perfect light Technology Co., Ltd. (PLS-SXE300D) keeping magnetic stirring. The amount of  $\text{H}_2$  was determined on an online GC1690 gas chromatograph (TCD) with  $\text{N}_2$  gas as the carrier gas.

The apparent quantum efficiency (AQE) of 1 wt% C-PAN/MS-CN at 420 nm monochromatic incident light was estimated by the following equation:

$$AQE[\%] = \frac{2 \times \text{number of evolved } H_2 \text{ molecules}}{\text{number of incident photons}}$$

The reaction conditions including the reactor were the same as those for the above photocatalytic reaction except using 420 nm monochromatic LED lamps (UVEC-4, Shenzhen LAMPLIC Science Co Ltd, China) with effective lighting area of 0.70 cm<sup>2</sup>. The intensity of incident light was measured to be 3.8 mW/cm<sup>2</sup>.

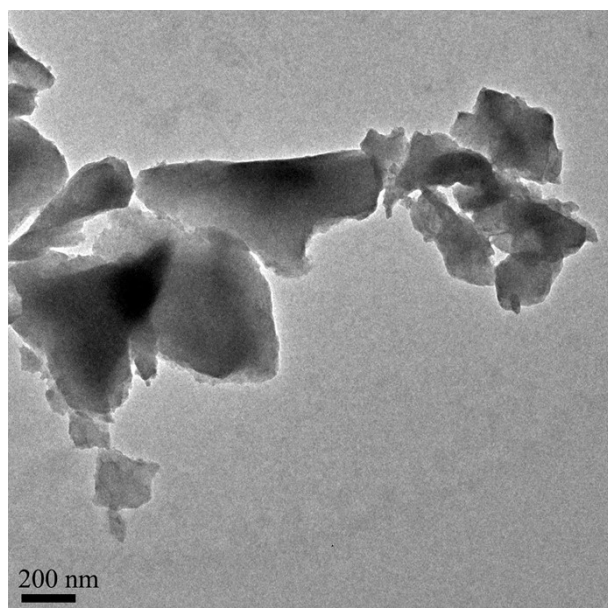

**Fig. S1** TEM images of C-PAN synthesized by calcining PAN to 500 °C in N<sub>2</sub> flow for 4 h in the presence of KCl and LiCl.

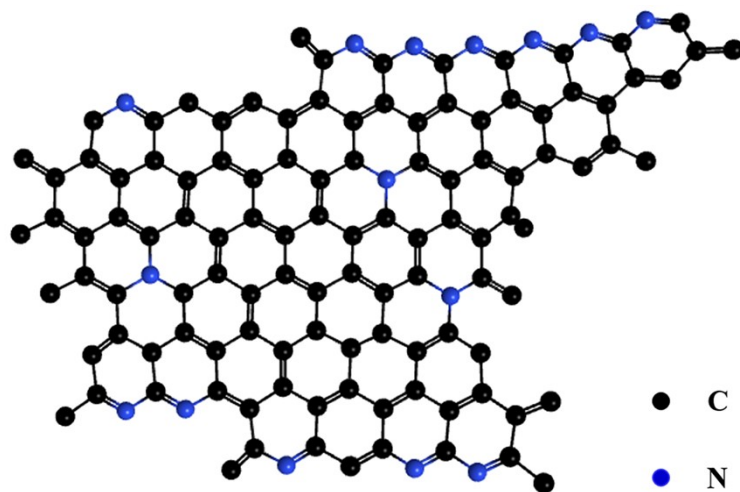

**Fig. S2** The conjugate network structure C-PAN.

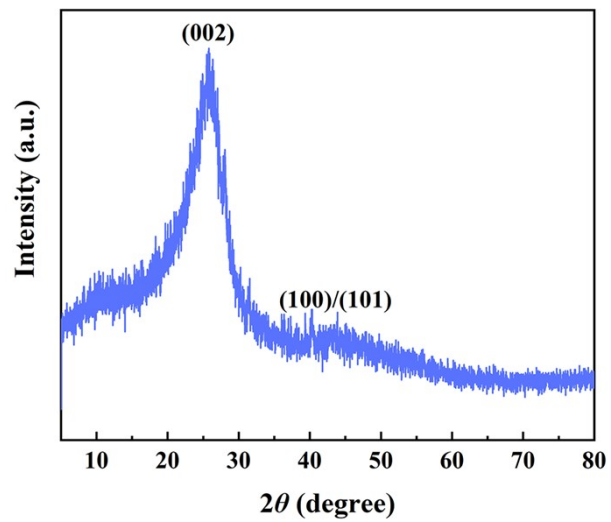

**Fig. S3** XRD pattern of C-PAN obtained by heating PAN to 500 °C in N<sub>2</sub> flow for 4 h in the presence of KCl and LiCl.



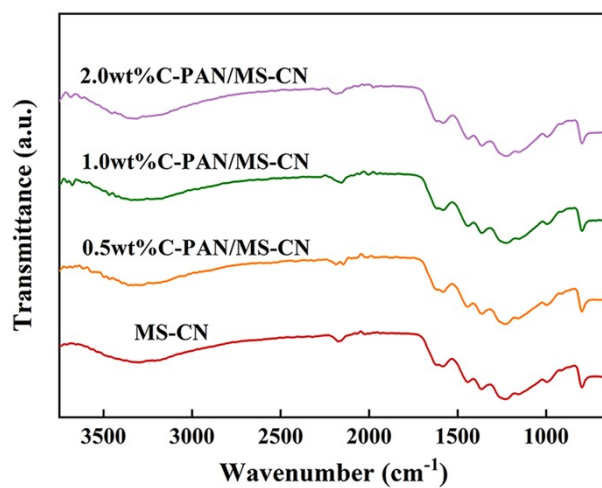

**Fig. S4** FT-IR spectra of MS-CN and C-PAN/MS-CN with different C-PAN contents.

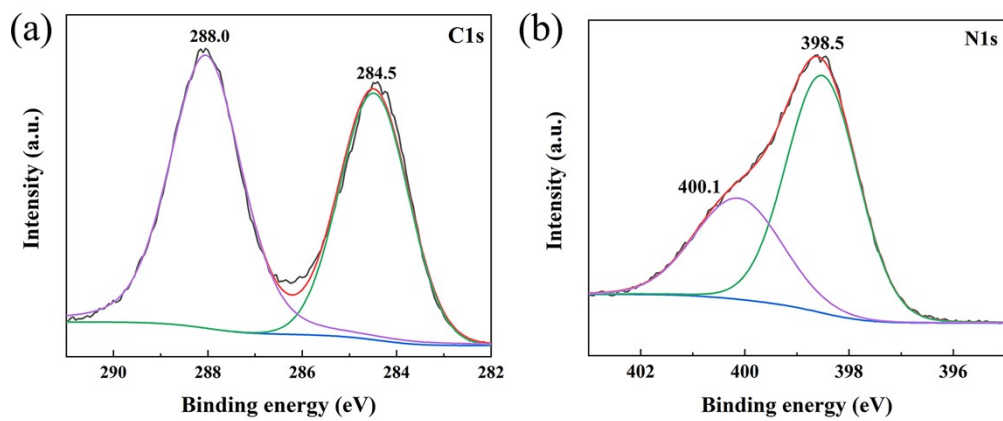

**Fig. S5** (a) high-resolution XPS spectra of C1s, and (b) N1s for 1 wt% C-PAN/MS-CN nanotubes.

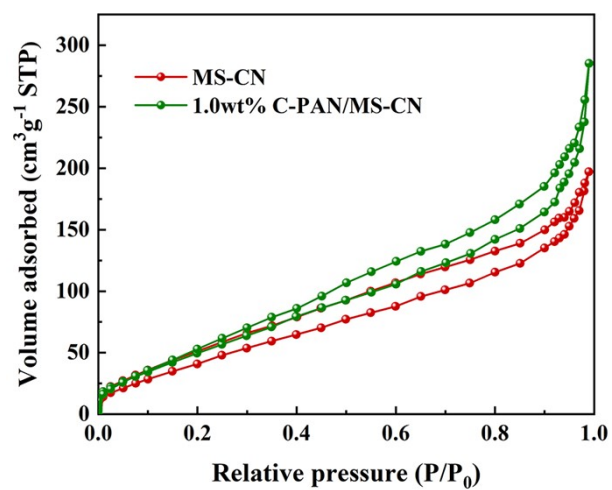

**Fig. S6** N<sub>2</sub> adsorption-desorption isotherm of MS-CN and 1 wt% C-PAN/MS-CN.

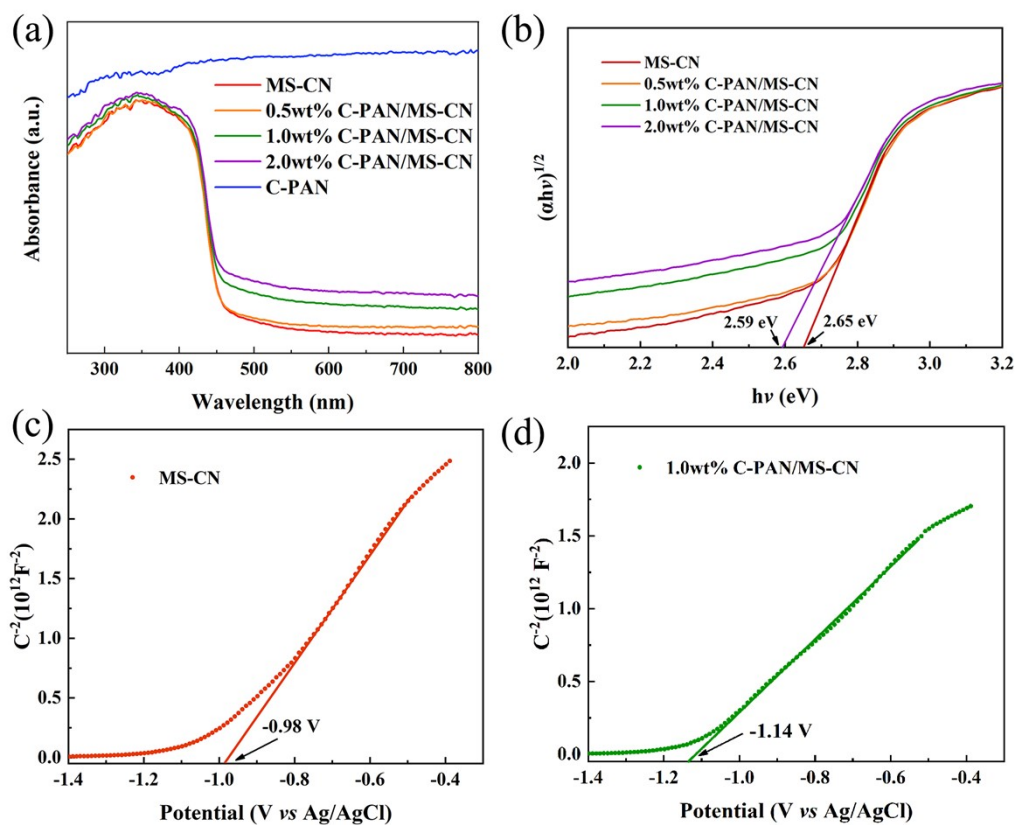

**Fig. S7** (a) UV-vis light absorption spectra and (b) bandgap energies of MS-CN and C-PAN/MS-CN nanotubes with different C-PAN content. Mott-Schottky plot of MS-CN (c) and 1 wt% C-PAN/MS-CN nanotubes (d).

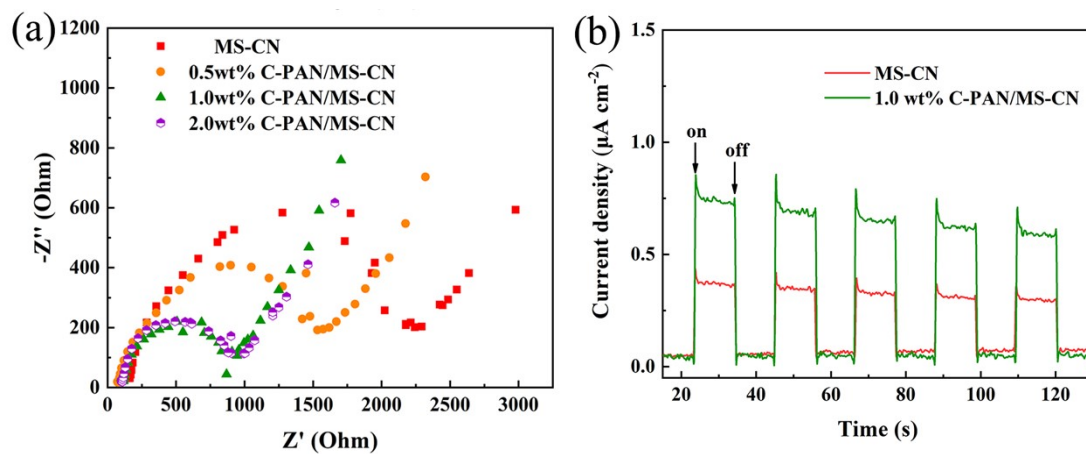

**Fig. S8** (a) EIS Nyquist plots of MS-CN and C-PAN/MS-CN nanotubes with different C-PAN content. (b) Transient photocurrent curves of MS-CN and 1 wt% C-PAN/MS-CN nanotubes.

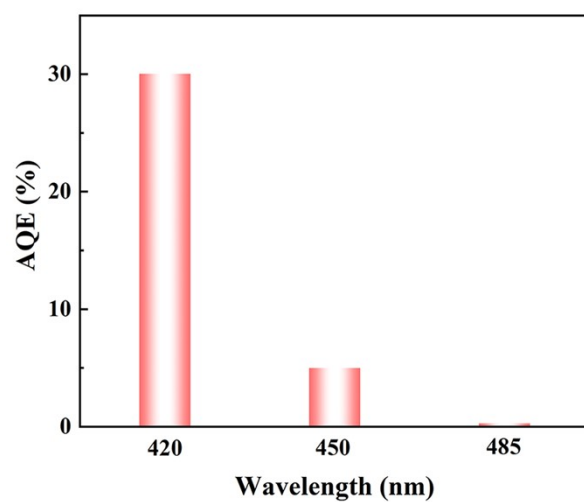

**Fig. S9** Apparent quantum efficiency (AQE) of H<sub>2</sub> evolution for 1wt% C-PAN/MS-CN nanotubes at different monochromatic wavelengths.

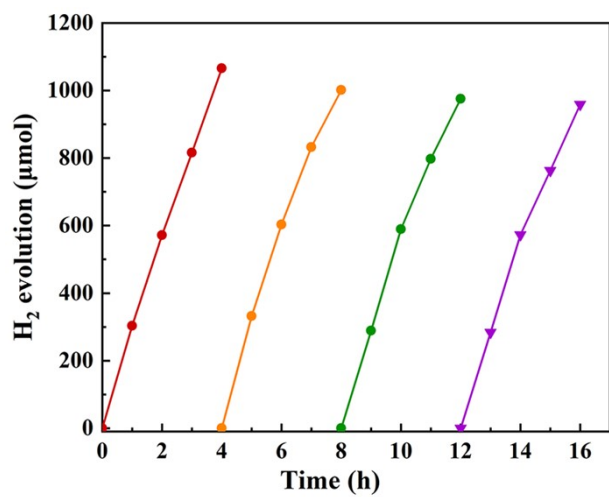

**Fig. S10** Photocatalytic H<sub>2</sub> evolution as a function of reaction time for 1wt% C-PAN/MS-CN

nanotubes.

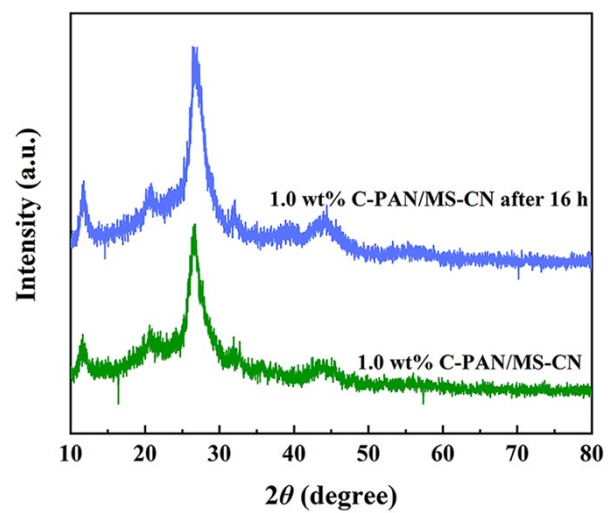

**Fig. S11** XRD patterns of the 1 wt% C-PAN/MS-CN nanotubes before and after the irradiation reaction for 16 h.
